# Supplementary material
Source: Springer Nature journal article supplement (https://www.springermedizin.de/resource/supplementary/12913_2010_1580_MOESM1_ESM.pdf/9529342)
Supplement: MOESM1 [file 9529342]

# Government policy & program support <sup>1</sup>

## Organisation level enabler – leadership

- Advocate & legitimise collaborative working
- Resources & strategy for change to collaborative practice
- Appropriate recruitment & staff development

## Evaluation feedback

### Physical infrastructure enabler

Appropriate collocated office for staff visibility and interaction

### Clinician attribute enabler

- Commitment to collaboration
- Skills in primary care & mental health
- Primary care focused & flexible work style
- Ability to fit into teams

### Link staff enabler

- Supervision
- Peer support

## Clinical level partnership formation activities

Joint development through active communication (preferably face to face)

Share information, plan & problem solve

- common goals <sup>2</sup>
- clinical processes <sup>3</sup>
- role clarification
- open communication culture

## Evaluation feedback
